# Supplementary material for: Identification of oral bacteria in the gut and foot ulcer of patients with diabetes mellitus – A secondary analysis of whole-metagenome and meta-transcriptomic microbiome data
Source: Research Square preprint supplement (doi:10.21203/rs.3.rs-1915837/v1), 2022-08-08
Supplement: Supplementary file 1 [file 92ada07e6499f3197b86f832.docx]

**Supplementary table 1:** Identified keywords used in search strategy.

| Search term for whole-metagenomic data | Search term for microbiome | Search term for disease |
| --- | --- | --- |
| Metagenom*  Whole-genom*  Whole genom*  Whole metagenom*  Genom*  Meta transcript*  RNA-sequenc*  RNA sequenc *  DNA- sequenc *  DNA sequenc * | Microb*  Bacteria* | Diabetes Mellitus  Diabetes Complications  Diabetic |

**Supplementary table 2:** Search strategy on Medline (Ovid platform).

Database: Ovid MEDLINE(R) ALL <1946 to August 13, 2021>

Search Strategy:

--------------------------------------------------------------------------------

1 Metagenomics/ (7379)

2 Metagenomic*.mp. (17911)

3 Whole metagenom*.mp. (233)

4 (Whole genom* or Whole-genom*).mp. (50750)

5 Genome/ (32726)

6 Genom*.mp. (743030)

7 Genome, Microbial/ (239)

8 Microbial genom*.mp. (2016)

9 Metatranscriptomic*.mp. (1303)

10 Meta transcript*.mp. (156)

11 (RNA sequenc* or RNA-sequenc*).mp. (36481)

12 (DNA sequenc* or DNA-sequenc*).mp. (98169)

13 1 or 2 or 3 or 4 or 5 or 6 or 7 or 8 or 9 or 10 or 11 or 12 (847003)

14 Microbiota/ (23159)

15 Microb*.mp. (1265564)

16 Bacteria/ (158219)

17 Bacteria*.mp. (1475849)

18 14 or 15 or 16 or 17 (2115357)

19 exp Diabetes Mellitus/ (451698)

20 Diabet*.mp. (748211)

21 (T2D or T2DM).tw. (36299)

22 exp Diabetes Complications/ (138013)

23 19 or 20 or 21 or 22 (750711)

24 13 and 18 and 23 (806)

25 limit 24 to yr="2011 -Current" (700)

26 limit 25 to english language (683)

***************************

**Supplementary table 3:** Selected samples from each study for the reanalysis of metagenomic data.

| Study | BioSample accession number | SRR or ERR number |
| --- | --- | --- |
| Davies 2020 | SAMN13258168 | [SRR10427830](https://trace.ncbi.nlm.nih.gov/Traces/sra/?run=SRR10427830) |
| Davies 2020 | SAMN13258166 | [SRR10427832](https://trace.ncbi.nlm.nih.gov/Traces/sra/?run=SRR10427832) |
| Davies 2020 | SAMN13258162 | [SRR10427837](https://trace.ncbi.nlm.nih.gov/Traces/sra/?run=SRR10427837) |
| Davies 2020 | SAMN13258139 | [SRR10427862](https://trace.ncbi.nlm.nih.gov/Traces/sra/?run=SRR10427862) |
| Davies 2020 | SAMN13258129 | [SRR10427873](https://trace.ncbi.nlm.nih.gov/Traces/sra/?run=SRR10427873) |
| Davies 2020 | SAMN13258127 | [SRR10427875](https://trace.ncbi.nlm.nih.gov/Traces/sra/?run=SRR10427875) |
| Davies 2020 | SAMN13258113 | [SRR10427890](https://trace.ncbi.nlm.nih.gov/Traces/sra/?run=SRR10427890) |
| Davies 2020 | SAMN13258105 | [SRR10427899](https://trace.ncbi.nlm.nih.gov/Traces/sra/?run=SRR10427899) |
| Davies 2020 | SAMN13258091 | [SRR10427836](https://trace.ncbi.nlm.nih.gov/Traces/sra/?run=SRR10427836) |
| Davies 2020 | SAMN13258131 | [SRR10427871](https://trace.ncbi.nlm.nih.gov/Traces/sra/?run=SRR10427871) |
| Davies 2020 | SAMN13258123 | [SRR10427879](https://trace.ncbi.nlm.nih.gov/Traces/sra/?run=SRR10427879) |
| Davies 2020 | SAMN13258117 | [SRR10427886](https://trace.ncbi.nlm.nih.gov/Traces/sra/?run=SRR10427886) |
| Davies 2020 | SAMN13258111 | [SRR10427893](https://trace.ncbi.nlm.nih.gov/Traces/sra/?run=SRR10427893) |
| Davies 2020 | SAMN13258158 | [SRR10427841](https://trace.ncbi.nlm.nih.gov/Traces/sra/?run=SRR10427841) |
| Davies 2020 | SAMN13258154 | [SRR10427845](https://trace.ncbi.nlm.nih.gov/Traces/sra/?run=SRR10427845) |
| Davies 2020 | SAMN13258146 | [SRR10427854](https://trace.ncbi.nlm.nih.gov/Traces/sra/?run=SRR10427854) |
| Davies 2020 | SAMN13258142 | [SRR10427859](https://trace.ncbi.nlm.nih.gov/Traces/sra/?run=SRR10427859) |
| Davies 2020 | SAMN13258121 | [SRR10427882](https://trace.ncbi.nlm.nih.gov/Traces/sra/?run=SRR10427882) |
| Heravi 2020 | SAMN12696390 | [SRR10074441](https://trace.ncbi.nlm.nih.gov/Traces/sra/?run=SRR10074441) |
| Heravi 2020 | SAMN12696389 | [SRR10074443](https://trace.ncbi.nlm.nih.gov/Traces/sra/?run=SRR10074443) |
| Heravi 2020 | SAMN12696388 | [SRR10074442](https://trace.ncbi.nlm.nih.gov/Traces/sra/?run=SRR10074442) |
| Heravi 2020 | SAMN12696387 | [SRR10074444](https://trace.ncbi.nlm.nih.gov/Traces/sra/?run=SRR10074444) |
| Heravi 2020 | SAMN12696386 | [SRR10074445](https://trace.ncbi.nlm.nih.gov/Traces/sra/?run=SRR10074445) |
| Heravi 2020 | SAMN12696384 | SRR10074448 |
| Heravi 2020 | SAMN12696383 | SRR10074449 |
| Heravi 2020 | SAMN12696382 | SRR10074450 |
| Heravi 2020 | SAMN12696381 | SRR10074451 |
| Heravi 2020 | SAMN12696380 | SRR10074452 |
| Heravi 2020 | SAMN12696379 | [SRR10074438](https://trace.ncbi.nlm.nih.gov/Traces/sra/?run=SRR10074438) |
| Heravi 2020 | SAMN12696378 | SRR10074439 |
| Heravi 2020 | SAMN12696377 | SRR10074440 |
| Heravi 2020 | SAMN12696376 | [SRR10074447](https://trace.ncbi.nlm.nih.gov/Traces/sra/?run=SRR10074447) |
| Heravi 2020 | SAMN12696375 | [SRR10074453](https://trace.ncbi.nlm.nih.gov/Traces/sra/?run=SRR10074453) |
| Karlsson 2013 | SAMEA1906549 | [ERR260273](https://trace.ncbi.nlm.nih.gov/Traces/sra/?run=ERR260273) |
| Karlsson 2013 | SAMEA1906445 | [ERR260271](https://trace.ncbi.nlm.nih.gov/Traces/sra/?run=ERR260271) |
| Karlsson 2013 | SAMEA1906540 | [ERR260174](https://trace.ncbi.nlm.nih.gov/Traces/sra/?run=ERR260174) |
| Karlsson 2013 | SAMEA1906512 | [ERR260165](https://trace.ncbi.nlm.nih.gov/Traces/sra/?run=ERR260165) |
| Karlsson 2013 | SAMEA1906571 | [ERR260151](https://trace.ncbi.nlm.nih.gov/Traces/sra/?run=ERR260151) |
| Karlsson 2013 | SAMEA1906495 | [ERR260186](https://trace.ncbi.nlm.nih.gov/Traces/sra/?run=ERR260186) |
| Karlsson 2013 | SAMEA1906479 | [ERR260181](https://trace.ncbi.nlm.nih.gov/Traces/sra/?run=ERR260181) |
| Karlsson 2013 | SAMEA1906583 | [ERR260176](https://trace.ncbi.nlm.nih.gov/Traces/sra/?run=ERR260176) |
| Karlsson 2013 | SAMEA1906456 | [ERR260167](https://trace.ncbi.nlm.nih.gov/Traces/sra/?run=ERR260167) |
| Karlsson 2013 | SAMEA1906469 | [ERR260166](https://trace.ncbi.nlm.nih.gov/Traces/sra/?run=ERR260166) |
| Karlsson 2013 | SAMEA1906462 | [ERR260208](https://trace.ncbi.nlm.nih.gov/Traces/sra/?run=ERR260208) |
| Karlsson 2013 | SAMEA1906524 | [ERR260194](https://trace.ncbi.nlm.nih.gov/Traces/sra/?run=ERR260194) |
| Karlsson 2013 | SAMEA1906444 | [ERR260188](https://trace.ncbi.nlm.nih.gov/Traces/sra/?run=ERR260188) |
| Karlsson 2013 | SAMEA1906428 | [ERR260270](https://trace.ncbi.nlm.nih.gov/Traces/sra/?run=ERR260270) |
| Karlsson 2013 | SAMEA1906572 | [ERR260235](https://trace.ncbi.nlm.nih.gov/Traces/sra/?run=ERR260235) |
| Karlsson 2013 | SAMEA1906579 | [ERR260214](https://trace.ncbi.nlm.nih.gov/Traces/sra/?run=ERR260214) |
| Karlsson 2013 | SAMEA1906531 | [ERR260203](https://trace.ncbi.nlm.nih.gov/Traces/sra/?run=ERR260203) |
| Karlsson 2013 | SAMEA1906558 | [ERR260144](https://trace.ncbi.nlm.nih.gov/Traces/sra/?run=ERR260144) |
| Karlsson 2013 | SAMEA1906465 | [ERR260139](https://trace.ncbi.nlm.nih.gov/Traces/sra/?run=ERR260139) |
| Palleja 2016 | SAMEA3888920 | [ERR1305898](https://trace.ncbi.nlm.nih.gov/Traces/sra/?run=ERR1305898) |
| Palleja 2016 | SAMEA3888918 | [ERR1305889](https://trace.ncbi.nlm.nih.gov/Traces/sra/?run=ERR1305889) |
| Palleja 2016 | SAMEA3888913 | [ERR1305906](https://trace.ncbi.nlm.nih.gov/Traces/sra/?run=ERR1305906) |
| Palleja 2016 | SAMEA3888911 | [ERR1305893](https://trace.ncbi.nlm.nih.gov/Traces/sra/?run=ERR1305893) |
| Palleja 2016 | SAMEA3888905 | [ERR1305904](https://trace.ncbi.nlm.nih.gov/Traces/sra/?run=ERR1305904) |
| Palleja 2016 | SAMEA3888904 | [ERR1305896](https://trace.ncbi.nlm.nih.gov/Traces/sra/?run=ERR1305896) |
| Palleja 2016 | SAMEA3888903 | [ERR1305909](https://trace.ncbi.nlm.nih.gov/Traces/sra/?run=ERR1305909) |
| Palleja 2016 | SAMEA3888902 | [ERR1305879](https://trace.ncbi.nlm.nih.gov/Traces/sra/?run=ERR1305879) |
| Palleja 2016 | SAMEA3888901 | [ERR1305886](https://trace.ncbi.nlm.nih.gov/Traces/sra/?run=ERR1305886) |
| Palleja 2016 | SAMEA3888898 | [ERR1305882](https://trace.ncbi.nlm.nih.gov/Traces/sra/?run=ERR1305882) |
| Palleja 2016 | SAMEA3888896 | [ERR1305891](https://trace.ncbi.nlm.nih.gov/Traces/sra/?run=ERR1305891) |
| Palleja 2016 | SAMEA3888894 | [ERR1305884](https://trace.ncbi.nlm.nih.gov/Traces/sra/?run=ERR1305884) |
| Qin 2012 | SRS333667 | [SRR1778453](https://trace.ncbi.nlm.nih.gov/Traces/sra/?run=SRR1778453) |
| Qin 2012 | SRS259448 | [SRR341595](https://trace.ncbi.nlm.nih.gov/Traces/sra/?run=SRR341595) |
| Qin 2012 | SRS259437 | [SRR341584](https://trace.ncbi.nlm.nih.gov/Traces/sra/?run=SRR341584) |
| Qin 2012 | SRS294931 | [SRR413675](https://trace.ncbi.nlm.nih.gov/Traces/sra/?run=SRR413675) |
| Qin 2012 | SRS259456 | [SRR341603](https://trace.ncbi.nlm.nih.gov/Traces/sra/?run=SRR341603) |
| Qin 2012 | SRS259482 | [SRR341629](https://trace.ncbi.nlm.nih.gov/Traces/sra/?run=SRR341629) |
| Qin 2012 | SRS294948 | [SRR413692](https://trace.ncbi.nlm.nih.gov/Traces/sra/?run=SRR413692) |
| Qin 2012 | SRS259508 | [SRR341655](https://trace.ncbi.nlm.nih.gov/Traces/sra/?run=SRR341655) |
| Qin 2012 | SRS259496 | [SRR341643](https://trace.ncbi.nlm.nih.gov/Traces/sra/?run=SRR341643) |
| Qin 2012 | SRS259525 | [SRR341672](https://trace.ncbi.nlm.nih.gov/Traces/sra/?run=SRR341672) |
| Qin 2012 | SRS259521 | [SRR341668](https://trace.ncbi.nlm.nih.gov/Traces/sra/?run=SRR341668) |
| Qin 2012 | SRS259551 | [SRR341698](https://trace.ncbi.nlm.nih.gov/Traces/sra/?run=SRR341698) |
| Qin 2012 | SRS294990 | [SRR413734](https://trace.ncbi.nlm.nih.gov/Traces/sra/?run=SRR413734) |
| Qin 2012 | SRS294821 | [SRR413565](https://trace.ncbi.nlm.nih.gov/Traces/sra/?run=SRR413565) |
| Qin 2012 | SRS259569 | [SRR341716](https://trace.ncbi.nlm.nih.gov/Traces/sra/?run=SRR341716) |
| Qin 2012 | SRS295004 | [SRR413748](https://trace.ncbi.nlm.nih.gov/Traces/sra/?run=SRR413748) |
| Qin 2012 | SRS294845 | [SRR413589](https://trace.ncbi.nlm.nih.gov/Traces/sra/?run=SRR413589) |
| Qin 2012 | SRS294883 | [SRR413627](https://trace.ncbi.nlm.nih.gov/Traces/sra/?run=SRR413627) |
| Qin 2012 | SRS294864 | [SRR413608](https://trace.ncbi.nlm.nih.gov/Traces/sra/?run=SRR413608) |
| Qin 2012 | SRS294902 | [SRR413646](https://trace.ncbi.nlm.nih.gov/Traces/sra/?run=SRR413646) |
| Sun 2018 | SAMN09864067 | [SRR7721871](https://trace.ncbi.nlm.nih.gov/Traces/sra/?run=SRR7721871) |
| Sun 2018 | SAMN09864068 | [SRR7721874](https://trace.ncbi.nlm.nih.gov/Traces/sra/?run=SRR7721874) |
| Sun 2018 | SAMN09864069 | [SRR7721873](https://trace.ncbi.nlm.nih.gov/Traces/sra/?run=SRR7721873) |
| Sun 2018 | SAMN09864066 | [SRR7721876](https://trace.ncbi.nlm.nih.gov/Traces/sra/?run=SRR7721876) |
| Sun 2018 | SAMN09864065 | [SRR7721875](https://trace.ncbi.nlm.nih.gov/Traces/sra/?run=SRR7721875) |
| Sun 2018 | SAMN09864064 | [SRR7721878](https://trace.ncbi.nlm.nih.gov/Traces/sra/?run=SRR7721878) |
| Sun 2018 | SAMN09864063 | [SRR7721877](https://trace.ncbi.nlm.nih.gov/Traces/sra/?run=SRR7721877) |
| Sun 2018 | SAMN09864062 | [SRR7721880](https://trace.ncbi.nlm.nih.gov/Traces/sra/?run=SRR7721880) |
| Sun 2018 | SAMN09864061 | [SRR7721879](https://trace.ncbi.nlm.nih.gov/Traces/sra/?run=SRR7721879) |
| Sun 2018 | SAMN09864060 | [SRR7721882](https://trace.ncbi.nlm.nih.gov/Traces/sra/?run=SRR7721882) |
| Sun 2018 | SAMN09864059 | [SRR7721881](https://trace.ncbi.nlm.nih.gov/Traces/sra/?run=SRR7721881) |
| Sun 2018 | SAMN09864049 | [SRR7721870](https://trace.ncbi.nlm.nih.gov/Traces/sra/?run=SRR7721870) |
| Sun 2018 | SAMN09864057 | [SRR7721883](https://trace.ncbi.nlm.nih.gov/Traces/sra/?run=SRR7721883) |
| Sun 2018 | SAMN09864056 | [SRR7721861](https://trace.ncbi.nlm.nih.gov/Traces/sra/?run=SRR7721861) |
| Sun 2018 | SAMN09864055 | [SRR7721862](https://trace.ncbi.nlm.nih.gov/Traces/sra/?run=SRR7721862) |
| Sun 2018 | SAMN09864054 | [SRR7721865](https://trace.ncbi.nlm.nih.gov/Traces/sra/?run=SRR7721865) |
| Sun 2018 | SAMN09864053 | [SRR7721866](https://trace.ncbi.nlm.nih.gov/Traces/sra/?run=SRR7721866) |
| Sun 2018 | SAMN09864052 | [SRR7721863](https://trace.ncbi.nlm.nih.gov/Traces/sra/?run=SRR7721863) |
| Sun 2018 | SAMN09864051 | [SRR7721864](https://trace.ncbi.nlm.nih.gov/Traces/sra/?run=SRR7721864) |
| Sun 2018 | SAMN09864050 | [SRR7721869](https://trace.ncbi.nlm.nih.gov/Traces/sra/?run=SRR7721869) |
| Zhang 2021 | SAMN17126344 | [SRR13279667](https://trace.ncbi.nlm.nih.gov/Traces/sra/?run=SRR13279667) |
| Zhang 2021 | SAMN17126339 | [SRR13279662](https://trace.ncbi.nlm.nih.gov/Traces/sra/?run=SRR13279662) |
| Zhang 2021 | SAMN17126332 | [SRR13279654](https://trace.ncbi.nlm.nih.gov/Traces/sra/?run=SRR13279654) |
| Zhang 2021 | SAMN17126327 | [SRR13279649](https://trace.ncbi.nlm.nih.gov/Traces/sra/?run=SRR13279649) |
| Zhang 2021 | SAMN17126324 | [SRR13279645](https://trace.ncbi.nlm.nih.gov/Traces/sra/?run=SRR13279645) |
| Zhang 2021 | SAMN17126320 | [SRR13279641](https://trace.ncbi.nlm.nih.gov/Traces/sra/?run=SRR13279641) |
| Zhang 2021 | SAMN17126310 | [SRR13279630](https://trace.ncbi.nlm.nih.gov/Traces/sra/?run=SRR13279630) |
| Zhang 2021 | SAMN17126292 | [SRR13279610](https://trace.ncbi.nlm.nih.gov/Traces/sra/?run=SRR13279610) |
| Zhang 2021 | SAMN17126289 | [SRR13279607](https://trace.ncbi.nlm.nih.gov/Traces/sra/?run=SRR13279607) |
| Zhang 2021 | SAMN17126278 | [SRR13279595](https://trace.ncbi.nlm.nih.gov/Traces/sra/?run=SRR13279595) |
| Zhang 2021 | SAMN17126273 | [SRR13279591](https://trace.ncbi.nlm.nih.gov/Traces/sra/?run=SRR13279591) |
| Zhang 2021 | SAMN17126272 | [SRR13279590](https://trace.ncbi.nlm.nih.gov/Traces/sra/?run=SRR13279590) |
| Zhang 2021 | SAMN17126293 | [SRR13279611](https://trace.ncbi.nlm.nih.gov/Traces/sra/?run=SRR13279611) |
| Zhang 2021 | SAMN17126285 | [SRR13279602](https://trace.ncbi.nlm.nih.gov/Traces/sra/?run=SRR13279602) |
| Zhang 2021 | SAMN17126295 | [SRR13279613](https://trace.ncbi.nlm.nih.gov/Traces/sra/?run=SRR13279613) |
| Zhang 2021 | SAMN17126303 | [SRR13279622](https://trace.ncbi.nlm.nih.gov/Traces/sra/?run=SRR13279622) |
| Zhang 2021 | SAMN17126312 | [SRR13279632](https://trace.ncbi.nlm.nih.gov/Traces/sra/?run=SRR13279632) |
| Zhang 2021 | SAMN17126288 | [SRR13279606](https://trace.ncbi.nlm.nih.gov/Traces/sra/?run=SRR13279606) |
| Zhang 2021 | SAMN17126337 | [SRR13279660](https://trace.ncbi.nlm.nih.gov/Traces/sra/?run=SRR13279660) |
| Zhang 2021 | SAMN17126345 | [SRR13279668](https://trace.ncbi.nlm.nih.gov/Traces/sra/?run=SRR13279668) |

**Supplementary table 4:** Oral origin bacterial species detected in selected studies.

| **Species** | **Perio complex** | **Gut** | | | | | | | **DFU** | **HOMD** | **HMP** |
| --- | --- | --- | --- | --- | --- | --- | --- | --- | --- | --- | --- |
| **Karlsson**  **2013** | **Palleja**  **2016** | **Qin**  **2012** | **Sun**  **2018** | **Davies 2020** | **Zhang**  **2021** | **Mean**  **GUT** | **Heravi**  **2020** |
| *xEscherichia coli* |  | 0.115102 | 0.003662 | 0.554576 | 0.872272 | 1.046365 | 0.204974 | 0.466158 | 0.056026 | 1 | 1 |
| *xBifidobacterium longum* |  | 0.405470 | 0.034099 | 0.330774 | 0.849977 | 0.022083 | 0.016113 | 0.276419 | 0.000047 | 1 | 1 |
| *xBifidobacterium breve* |  | 0.007435 | 0.001867 | 0.475341 | 0.026889 | 0.002307 | 0.003329 | 0.086195 | 0.003191 | 1 | 1 |
| *xLactobacillus acidophilus* |  | 0.002415 | 0.000000 | 0.000132 | 0.411640 | 0.000100 | 0.000147 | 0.069072 | 0.000069 | 1 | 1 |
| *xVeillonella parvula* |  | 0.019768 | 0.001202 | 0.027995 | 0.278245 | 0.011956 | 0.032659 | 0.061971 | 0.001863 | 1 | 1 |
| *xStreptococcus salivarius* |  | 0.224582 | 0.019798 | 0.031776 | 0.056375 | 0.003199 | 0.015612 | 0.058557 | 0.000198 | 1 | 1 |
| *x,yKlebsiella pneumoniae* |  | 0.048401 | 0.001431 | 0.120823 | 0.063323 | 0.012518 | 0.049699 | 0.049366 | 0.423949 | 1 | 1 |
| *xLactobacillus reuteri* |  | 0.215277 | 0.004066 | 0.000945 | 0.006201 | 0.000187 | 0.000235 | 0.037819 | 0.000131 | 1 | 0 |
| *xHaemophilus parainfluenzae* |  | 0.017572 | 0.020880 | 0.046471 | 0.014431 | 0.007715 | 0.081142 | 0.031368 | 0.002335 | 1 | 1 |
| *xEggerthella lenta* |  | 0.050720 | 0.013469 | 0.054135 | 0.010837 | 0.033171 | 0.008144 | 0.028413 | 0.000003 | 1 | 1 |
| *Streptococcus thermophilus* |  | 0.112136 | 0.003396 | 0.001811 | 0.004898 | 0.000527 | 0.001156 | 0.020654 | 0.000085 | 1 | 1 |
| *Veillonella atypica* |  | 0.005954 | 0.000476 | 0.004298 | 0.083789 | 0.011371 | 0.005557 | 0.018574 | 0.000042 | 1 | 1 |
| *Prevotella melaninogenica* |  | 0.011224 | 0.039144 | 0.011606 | 0.007593 | 0.002815 | 0.031077 | 0.017243 | 0.038252 | 1 | 1 |
| *Prevotella intermedia* | 2 | 0.006647 | 0.031430 | 0.006904 | 0.008533 | 0.003647 | 0.021288 | 0.013075 | 0.033736 | 1 | 0 |
| *Streptococcus parasanguinis* |  | 0.016916 | 0.003613 | 0.004605 | 0.034919 | 0.001156 | 0.007260 | 0.011412 | 0.000005 | 1 | 1 |
| *Desulfovibrio fairfieldensis* |  | 0.019107 | 0.000909 | 0.001126 | 0.001553 | 0.038622 | 0.004431 | 0.010958 | 0.000134 | 1 | 0 |
| *Prevotella dentalis* |  | 0.005807 | 0.024948 | 0.009139 | 0.004953 | 0.001429 | 0.017102 | 0.010563 | 0.002512 | 1 | 0 |
| *Pseudomonas aeruginosa* |  | 0.002277 | 0.001908 | 0.001806 | 0.007167 | 0.013010 | 0.036296 | 0.010411 | 0.000086 | 1 | 1 |
| *Kluyvera ascorbata* |  | 0.000031 | 0.000000 | 0.000044 | 0.004254 | 0.052840 | 0.000793 | 0.009660 | 0.000003 | 1 | 0 |
| *Bifidobacterium dentium* |  | 0.013908 | 0.000688 | 0.004273 | 0.032366 | 0.000471 | 0.003936 | 0.009274 | 0.000048 | 1 | 1 |
| *Prevotella buccalis* |  | 0.005029 | 0.019183 | 0.006676 | 0.007215 | 0.002790 | 0.013769 | 0.009110 | 0.040400 | 1 | 1 |
| *Bacteroides zoogleoformans* |  | 0.003533 | 0.007725 | 0.008200 | 0.007193 | 0.005408 | 0.020406 | 0.008744 | 0.000892 | 1 | 0 |
| *Bacteroides heparinolyticus* |  | 0.003165 | 0.004129 | 0.006986 | 0.007718 | 0.007260 | 0.019876 | 0.008189 | 0.002514 | 1 | 0 |
| *Rothia mucilaginosa* |  | 0.020245 | 0.004380 | 0.004568 | 0.007342 | 0.001218 | 0.005362 | 0.007186 | 0.000031 | 1 | 1 |
| *yEnterococcus faecalis* |  | 0.014263 | 0.001196 | 0.023625 | 0.002096 | 0.000696 | 0.001149 | 0.007171 | 0.071766 | 1 | 1 |
| *Prevotella denticola* |  | 0.003968 | 0.014511 | 0.006082 | 0.004444 | 0.001226 | 0.009871 | 0.006684 | 0.008205 | 1 | 0 |
| *Lactococcus lactis* |  | 0.017472 | 0.016041 | 0.000288 | 0.000316 | 0.000380 | 0.000506 | 0.005834 | 0.000111 | 1 | 1 |
| *Bifidobacterium animalis* |  | 0.030883 | 0.001410 | 0.000298 | 0.000495 | 0.000483 | 0.000348 | 0.005653 | 0.000005 | 1 | 1 |
| *Eubacterium limosum* |  | 0.006163 | 0.003806 | 0.010285 | 0.004545 | 0.005001 | 0.003979 | 0.005630 | 0.000080 | 1 | 1 |
| *Lactobacillus johnsonii* |  | 0.027538 | 0.000000 | 0.000402 | 0.005194 | 0.000139 | 0.000254 | 0.005588 | 0.000160 | 1 | 0 |
| *Streptococcus vestibularis* |  | 0.022102 | 0.001289 | 0.001430 | 0.007504 | 0.000178 | 0.000430 | 0.005489 | 0.000003 | 1 | 1 |
| *Lachnoanaerobaculum umeaense* |  | 0.008616 | 0.003950 | 0.004160 | 0.004276 | 0.003866 | 0.006628 | 0.005250 | 0.000179 | 1 | 0 |
| *Lactobacillus crispatus* |  | 0.000638 | 0.000000 | 0.002010 | 0.027209 | 0.000166 | 0.000195 | 0.005036 | 0.000057 | 1 | 1 |
| *yPorphyromonas asaccharolytica* |  | 0.000549 | 0.001058 | 0.000758 | 0.023588 | 0.001598 | 0.002092 | 0.004940 | 1.323558 | 1 | 1 |
| *Prevotella oris* |  | 0.002051 | 0.012808 | 0.003691 | 0.001825 | 0.000628 | 0.007809 | 0.004802 | 0.008410 | 1 | 1 |
| *Prevotella fusca* |  | 0.001847 | 0.008419 | 0.003734 | 0.002647 | 0.000597 | 0.008743 | 0.004331 | 0.006859 | 1 | 0 |
| *Veillonella dispar* |  | 0.002225 | 0.000606 | 0.002588 | 0.010216 | 0.003687 | 0.004225 | 0.003925 | 0.000072 | 1 | 1 |
| *Enterobacter hormaechei* |  | 0.000294 | 0.000924 | 0.000862 | 0.003665 | 0.002355 | 0.014258 | 0.003726 | 0.000263 | 1 | 0 |
| *Schaalia odontolytica* |  | 0.011065 | 0.001876 | 0.001533 | 0.004145 | 0.001367 | 0.002027 | 0.003669 | 0.000096 | 1 | 0 |
| *Streptococcus gordonii* |  | 0.003580 | 0.001797 | 0.001978 | 0.006156 | 0.000505 | 0.006338 | 0.003392 | 0.000076 | 1 | 1 |
| *Prevotella nigrescens* | 1 | 0.001363 | 0.004187 | 0.002352 | 0.003415 | 0.000735 | 0.008238 | 0.003382 | 0.012921 | 1 | 0 |
| *Streptococcus oralis* |  | 0.002600 | 0.002402 | 0.002089 | 0.007946 | 0.001377 | 0.003340 | 0.003292 | 0.000274 | 1 | 1 |
| *Prevotella multiformis* |  | 0.002552 | 0.005057 | 0.003385 | 0.002149 | 0.000558 | 0.005283 | 0.003164 | 0.004229 | 1 | 1 |
| *Porphyromonas gingivalis* | 1 | 0.001617 | 0.002475 | 0.003454 | 0.003772 | 0.001722 | 0.004883 | 0.002987 | 0.000897 | 1 | 1 |
| *Selenomonas sputigena* |  | 0.001131 | 0.010605 | 0.000397 | 0.002299 | 0.002136 | 0.001267 | 0.002972 | 0.000784 | 1 | 0 |
| *Streptococcus mitis* |  | 0.001822 | 0.002203 | 0.001479 | 0.002983 | 0.001851 | 0.005365 | 0.002617 | 0.000125 | 1 | 1 |
| *Prevotella veroralis* |  | 0.001666 | 0.005413 | 0.001777 | 0.001509 | 0.001017 | 0.003849 | 0.002538 | 0.011466 | 1 | 1 |
| *Streptococcus anginosus* |  | 0.003144 | 0.000445 | 0.003754 | 0.004811 | 0.000574 | 0.002091 | 0.002470 | 0.000758 | 1 | 1 |
| *Klebsiella aerogenes* |  | 0.000346 | 0.000000 | 0.001179 | 0.007105 | 0.001396 | 0.003629 | 0.002276 | 0.000076 | 1 | 0 |
| *Prevotella enoeca* |  | 0.001625 | 0.002274 | 0.002347 | 0.001743 | 0.000680 | 0.004902 | 0.002262 | 0.002553 | 1 | 0 |
| *Streptococcus sanguinis* |  | 0.002923 | 0.001332 | 0.002211 | 0.003587 | 0.000601 | 0.002596 | 0.002208 | 0.000166 | 1 | 1 |
| *Streptococcus mutans* |  | 0.010690 | 0.000031 | 0.000367 | 0.001402 | 0.000157 | 0.000460 | 0.002184 | 0.000055 | 1 | 1 |
| *Dialister pneumosintes* |  | 0.002730 | 0.000930 | 0.001113 | 0.002814 | 0.004012 | 0.000559 | 0.002026 | 0.004251 | 1 | 0 |
| *Prevotella histicola* |  | 0.001199 | 0.003891 | 0.001473 | 0.001163 | 0.000339 | 0.003585 | 0.001942 | 0.036645 | 1 | 0 |
| *Streptococcus lactarius* |  | 0.002342 | 0.001431 | 0.000920 | 0.005003 | 0.000177 | 0.001547 | 0.001903 | 0.000010 | 1 | 0 |
| *Tannerella forsythia* | 1 | 0.000744 | 0.001705 | 0.001179 | 0.001234 | 0.001303 | 0.003357 | 0.001587 | 0.003395 | 1 | 0 |
| *yStaphylococcus aureus* |  | 0.001340 | 0.002984 | 0.000483 | 0.001141 | 0.000622 | 0.002828 | 0.001566 | 0.426092 | 1 | 1 |
| *Prevotella scopos* |  | 0.000890 | 0.003166 | 0.001307 | 0.000595 | 0.000250 | 0.002494 | 0.001450 | 0.017160 | 1 | 0 |
| *Lactobacillus gasseri* |  | 0.004139 | 0.000000 | 0.000692 | 0.002953 | 0.000074 | 0.000416 | 0.001379 | 0.000500 | 1 | 1 |
| *Olsenella uli* |  | 0.001678 | 0.000092 | 0.000827 | 0.004181 | 0.000487 | 0.000801 | 0.001344 | 0.000021 | 1 | 0 |
| *Streptococcus australis* |  | 0.001738 | 0.001040 | 0.000718 | 0.002288 | 0.000275 | 0.001739 | 0.001299 | 0.000005 | 1 | 1 |
| *Fusobacterium nucleatum* | 2 | 0.001118 | 0.000560 | 0.000487 | 0.002714 | 0.001555 | 0.000923 | 0.001226 | 0.032227 | 1 | 1 |
| *Streptococcus agalactiae* |  | 0.002276 | 0.000031 | 0.001283 | 0.001109 | 0.000788 | 0.001429 | 0.001153 | 0.004918 | 1 | 1 |
| *Mogibacterium diversum* |  | 0.003079 | 0.000340 | 0.001199 | 0.000963 | 0.000494 | 0.000680 | 0.001126 | 0.000113 | 1 | 0 |
| *Streptococcus pneumoniae* |  | 0.001349 | 0.000535 | 0.000678 | 0.001526 | 0.000811 | 0.001800 | 0.001116 | 0.011987 | 1 | 1 |
| *Granulicatella adiacens* |  | 0.000864 | 0.000849 | 0.001547 | 0.001302 | 0.000575 | 0.000638 | 0.000962 | 0.000044 | 1 | 1 |
| *Streptococcus sobrinus* |  | 0.000430 | 0.000000 | 0.000141 | 0.004646 | 0.000079 | 0.000228 | 0.000921 | 0.000016 | 1 | 0 |
| *yFinegoldia magna* |  | 0.001531 | 0.000123 | 0.000652 | 0.001449 | 0.000822 | 0.000840 | 0.000903 | 0.325185 | 1 | 1 |
| *Streptococcus cristatus* |  | 0.000978 | 0.000251 | 0.000619 | 0.001730 | 0.000287 | 0.001526 | 0.000899 | 0.000092 | 1 | 1 |
| *Enterococcus casseliflavus* |  | 0.000270 | 0.000031 | 0.003397 | 0.001057 | 0.000298 | 0.000335 | 0.000898 | 0.000020 | 1 | 0 |
| *Pseudomonas stutzeri* |  | 0.000721 | 0.001352 | 0.000346 | 0.000931 | 0.000581 | 0.001084 | 0.000836 | 0.000296 | 1 | 0 |
| *yParvimonas micra* |  | 0.001195 | 0.001117 | 0.000714 | 0.000614 | 0.000681 | 0.000589 | 0.000818 | 0.513673 | 1 | 0 |
| *Enterobacter cancerogenus* |  | 0.000114 | 0.000000 | 0.000162 | 0.002877 | 0.000922 | 0.000428 | 0.000750 | 0.000013 | 1 | 1 |
| *Campylobacter concisus* |  | 0.000659 | 0.000771 | 0.000475 | 0.000338 | 0.000263 | 0.001638 | 0.000691 | 0.000092 | 1 | 1 |
| *Fretibacterium fastidiosum* |  | 0.000753 | 0.001163 | 0.000205 | 0.000697 | 0.000543 | 0.000751 | 0.000685 | 0.000004 | 1 | 0 |
| *Rothia dentocariosa* |  | 0.002096 | 0.000000 | 0.000122 | 0.001309 | 0.000269 | 0.000220 | 0.000669 | 0.000008 | 1 | 1 |
| *Treponema medium* |  | 0.001089 | 0.001294 | 0.000395 | 0.000402 | 0.000365 | 0.000421 | 0.000661 | 0.000011 | 1 | 0 |
| *Stenotrophomonas maltophilia* |  | 0.000510 | 0.000754 | 0.000270 | 0.000653 | 0.000443 | 0.001113 | 0.000624 | 0.000177 | 1 | 0 |
| *Mogibacterium pumilum* |  | 0.000988 | 0.000766 | 0.000471 | 0.000437 | 0.000465 | 0.000587 | 0.000619 | 0.000542 | 1 | 0 |
| *Cronobacter sakazakii* |  | 0.000086 | 0.000000 | 0.000149 | 0.000455 | 0.000455 | 0.002475 | 0.000603 | 0.000024 | 1 | 0 |
| *Filifactor alocis* |  | 0.001326 | 0.000282 | 0.000740 | 0.000483 | 0.000345 | 0.000419 | 0.000599 | 0.000858 | 1 | 0 |
| *Gemella sanguinis* |  | 0.001092 | 0.000031 | 0.000837 | 0.000605 | 0.000505 | 0.000426 | 0.000583 | 0.000158 | 1 | 0 |
| *Serratia marcescens* |  | 0.000287 | 0.000126 | 0.001649 | 0.000419 | 0.000506 | 0.000496 | 0.000581 | 0.000140 | 1 | 0 |
| *Pseudomonas fluorescens* |  | 0.000474 | 0.000785 | 0.000318 | 0.000504 | 0.000506 | 0.000891 | 0.000580 | 0.000045 | 1 | 1 |
| *Streptococcus pyogenes* |  | 0.000776 | 0.001731 | 0.000190 | 0.000404 | 0.000170 | 0.000189 | 0.000577 | 0.005066 | 1 | 0 |
| *Porphyromonas endodontalis* |  | 0.000287 | 0.000511 | 0.000578 | 0.000630 | 0.000274 | 0.001174 | 0.000576 | 0.000661 | 1 | 0 |
| *Fastidiosipila sanguinis* |  | 0.000886 | 0.000568 | 0.000315 | 0.000590 | 0.000344 | 0.000646 | 0.000558 | 0.026452 | 1 | 0 |
| *Haemophilus influenzae* |  | 0.000213 | 0.000504 | 0.000573 | 0.000178 | 0.000262 | 0.001274 | 0.000501 | 0.000193 | 1 | 1 |
| *Bifidobacterium scardovii* |  | 0.000500 | 0.001076 | 0.000270 | 0.000505 | 0.000245 | 0.000344 | 0.000490 | 0.000006 | 1 | 0 |
| *Granulicatella elegans* |  | 0.000660 | 0.000823 | 0.000365 | 0.000322 | 0.000408 | 0.000344 | 0.000487 | 0.004967 | 1 | 1 |
| *yPeptoniphilus harei* |  | 0.000722 | 0.000092 | 0.000394 | 0.001081 | 0.000281 | 0.000326 | 0.000483 | 0.345757 | 1 | 1 |
| *Actinomyces oris* |  | 0.001102 | 0.000987 | 0.000146 | 0.000277 | 0.000107 | 0.000166 | 0.000464 | 0.000072 | 1 | 1 |
| *Abiotrophia defectiva* |  | 0.000428 | 0.000159 | 0.000496 | 0.000186 | 0.000491 | 0.000988 | 0.000458 | 0.000024 | 1 | 1 |
| *Agrobacterium tumefaciens* |  | 0.000409 | 0.000907 | 0.000150 | 0.000342 | 0.000347 | 0.000578 | 0.000456 | 0.000196 | 1 | 0 |
| *Treponema parvum* |  | 0.000495 | 0.001141 | 0.000216 | 0.000320 | 0.000211 | 0.000294 | 0.000446 | 0.000048 | 1 | 0 |
| *Parascardovia denticolens* |  | 0.001518 | 0.000000 | 0.000134 | 0.000449 | 0.000107 | 0.000441 | 0.000442 | 0.000048 | 1 | 0 |
| *yStaphylococcus haemolyticus* |  | 0.000458 | 0.000442 | 0.000126 | 0.000408 | 0.000122 | 0.000953 | 0.000418 | 0.110656 | 1 | 1 |
| *Streptococcus intermedius* |  | 0.000590 | 0.000000 | 0.000621 | 0.000743 | 0.000114 | 0.000377 | 0.000408 | 0.000247 | 1 | 0 |
| *Haemophilus haemolyticus* |  | 0.000192 | 0.000000 | 0.001057 | 0.000166 | 0.000215 | 0.000815 | 0.000407 | 0.000031 | 1 | 0 |
| *Aggregatibacter aphrophilus* |  | 0.000337 | 0.000288 | 0.000313 | 0.000165 | 0.000294 | 0.001022 | 0.000403 | 0.000033 | 1 | 1 |
| *Lautropia mirabilis* |  | 0.000184 | 0.000859 | 0.000114 | 0.000218 | 0.000495 | 0.000494 | 0.000394 | 0.000074 | 1 | 1 |
| *Listeria monocytogenes* |  | 0.000609 | 0.000157 | 0.000311 | 0.000360 | 0.000368 | 0.000470 | 0.000379 | 0.000991 | 1 | 1 |
| *Moraxella osloensis* |  | 0.000127 | 0.000000 | 0.000063 | 0.001801 | 0.000117 | 0.000110 | 0.000370 | 0.000088 | 1 | 0 |
| *Gemella haemolysans* |  | 0.000493 | 0.000138 | 0.000421 | 0.000326 | 0.000346 | 0.000471 | 0.000366 | 0.000244 | 1 | 1 |
| *Lactobacillus iners* |  | 0.000643 | 0.000504 | 0.000168 | 0.000295 | 0.000209 | 0.000274 | 0.000349 | 0.000600 | 1 | 1 |
| *Arachnia propionica* |  | 0.000355 | 0.000586 | 0.000423 | 0.000144 | 0.000160 | 0.000424 | 0.000349 | 0.000011 | 1 | 0 |
| *Schaalia meyeri* |  | 0.000718 | 0.000551 | 0.000141 | 0.000260 | 0.000143 | 0.000241 | 0.000342 | 0.000150 | 1 | 0 |
| *Campylobacter ureolyticus* |  | 0.000109 | 0.000000 | 0.000061 | 0.000161 | 0.001561 | 0.000060 | 0.000325 | 0.000158 | 1 | 0 |
| *Gemella morbillorum* |  | 0.000476 | 0.000157 | 0.000355 | 0.000286 | 0.000314 | 0.000276 | 0.000311 | 0.024066 | 1 | 0 |
| *Streptococcus constellatus* | 2 | 0.000326 | 0.000159 | 0.000315 | 0.000673 | 0.000077 | 0.000281 | 0.000305 | 0.000089 | 1 | 0 |
| *Achromobacter xylosoxidans* |  | 0.000306 | 0.000340 | 0.000122 | 0.000321 | 0.000236 | 0.000476 | 0.000300 | 0.000101 | 1 | 0 |
| *Fusobacterium necrophorum* |  | 0.000298 | 0.000297 | 0.000175 | 0.000176 | 0.000243 | 0.000493 | 0.000280 | 0.000500 | 1 | 0 |
| *yAnaerococcus prevotii* |  | 0.000635 | 0.000000 | 0.000177 | 0.000380 | 0.000207 | 0.000279 | 0.000280 | 0.221234 | 1 | 0 |
| *Desulfomicrobium orale* |  | 0.000322 | 0.000219 | 0.000195 | 0.000280 | 0.000329 | 0.000331 | 0.000279 | 0.000003 | 1 | 0 |
| *Capnocytophaga sputigena* |  | 0.000145 | 0.000215 | 0.000218 | 0.000182 | 0.000128 | 0.000738 | 0.000271 | 0.000068 | 1 | 1 |
| *Treponema socranskii* |  | 0.000342 | 0.000414 | 0.000140 | 0.000175 | 0.000211 | 0.000324 | 0.000268 | 0.000005 | 1 | 0 |
| *Actinomyces naeslundii* |  | 0.000908 | 0.000159 | 0.000145 | 0.000166 | 0.000072 | 0.000108 | 0.000260 | 0.000004 | 1 | 0 |
| *Eikenella corrodens* |  | 0.000076 | 0.000340 | 0.000068 | 0.000142 | 0.000109 | 0.000782 | 0.000253 | 0.005121 | 1 | 1 |
| *Acinetobacter baumannii* |  | 0.000209 | 0.000000 | 0.000164 | 0.000387 | 0.000175 | 0.000556 | 0.000248 | 0.003271 | 1 | 1 |
| *Dolosigranulum pigrum* |  | 0.000409 | 0.000190 | 0.000211 | 0.000203 | 0.000195 | 0.000265 | 0.000245 | 0.001054 | 1 | 0 |
| *Campylobacter rectus* | 2 | 0.000060 | 0.000108 | 0.000024 | 0.000119 | 0.000992 | 0.000162 | 0.000244 | 0.000002 | 1 | 1 |
| *Bacillus subtilis* |  | 0.000350 | 0.000266 | 0.000152 | 0.000211 | 0.000261 | 0.000220 | 0.000243 | 0.001013 | 1 | 0 |
| *Treponema denticola* | 1 | 0.000395 | 0.000138 | 0.000117 | 0.000234 | 0.000292 | 0.000259 | 0.000239 | 0.000226 | 1 | 1 |
| *Lactobacillus jensenii* |  | 0.000289 | 0.000554 | 0.000096 | 0.000205 | 0.000127 | 0.000115 | 0.000231 | 0.000107 | 1 | 1 |
| *yProteus mirabilis* |  | 0.000093 | 0.000000 | 0.000404 | 0.000140 | 0.000619 | 0.000129 | 0.000231 | 1.717781 | 1 | 1 |
| *Staphylococcus epidermidis* |  | 0.000411 | 0.000138 | 0.000084 | 0.000151 | 0.000487 | 0.000108 | 0.000230 | 0.008238 | 1 | 1 |
| *Jonquetella anthropi* |  | 0.000275 | 0.000159 | 0.000095 | 0.000222 | 0.000334 | 0.000291 | 0.000229 | 0.000003 | 1 | 1 |
| *Variovorax paradoxus* |  | 0.000248 | 0.000031 | 0.000192 | 0.000283 | 0.000146 | 0.000468 | 0.000228 | 0.000042 | 1 | 0 |
| *Lactobacillus ultunensis* |  | 0.000361 | 0.000000 | 0.000063 | 0.000766 | 0.000048 | 0.000104 | 0.000224 | 0.000072 | 1 | 0 |
| *Gardnerella vaginalis* |  | 0.000371 | 0.000159 | 0.000152 | 0.000140 | 0.000197 | 0.000319 | 0.000223 | 0.000233 | 1 | 1 |
| *Capnocytophaga gingivalis* |  | 0.000118 | 0.000108 | 0.000211 | 0.000110 | 0.000173 | 0.000614 | 0.000222 | 0.000016 | 1 | 1 |
| *Helicobacter pylori* |  | 0.000305 | 0.000031 | 0.000134 | 0.000199 | 0.000233 | 0.000339 | 0.000207 | 0.000181 | 1 | 1 |
| *Melioribacter roseus* |  | 0.000276 | 0.000031 | 0.000239 | 0.000109 | 0.000183 | 0.000377 | 0.000203 | 0.000013 | 1 | 0 |
| *Campylobacter showae* | 2 | 0.000071 | 0.000126 | 0.000038 | 0.000131 | 0.000069 | 0.000745 | 0.000197 | 0.000026 | 1 | 1 |
| *Cryptobacterium curtum* |  | 0.000469 | 0.000188 | 0.000141 | 0.000141 | 0.000095 | 0.000128 | 0.000194 | 0.000001 | 1 | 1 |
| *Corynebacterium diphtheriae* |  | 0.000120 | 0.000791 | 0.000034 | 0.000061 | 0.000043 | 0.000113 | 0.000194 | 0.000027 | 1 | 0 |
| *Micrococcus luteus* |  | 0.000133 | 0.000612 | 0.000027 | 0.000115 | 0.000124 | 0.000142 | 0.000192 | 0.000008 | 1 | 1 |
| *Bifidobacterium subtile* |  | 0.000346 | 0.000031 | 0.000097 | 0.000356 | 0.000132 | 0.000177 | 0.000190 | 0.000007 | 1 | 0 |
| *Campylobacter gracilis* | 2 | 0.000084 | 0.000000 | 0.000128 | 0.000663 | 0.000058 | 0.000187 | 0.000186 | 0.000018 | 1 | 1 |
| *Scardovia inopinata* |  | 0.000212 | 0.000352 | 0.000076 | 0.000255 | 0.000089 | 0.000127 | 0.000185 | 0.000004 | 1 | 0 |
| *Rothia aeria* |  | 0.000285 | 0.000000 | 0.000133 | 0.000349 | 0.000115 | 0.000223 | 0.000184 | 0.000009 | 1 | 0 |
| *Capnocytophaga haemolytica* |  | 0.000168 | 0.000031 | 0.000177 | 0.000111 | 0.000135 | 0.000475 | 0.000183 | 0.000041 | 1 | 0 |
| *Leptotrichia wadei* |  | 0.000254 | 0.000000 | 0.000103 | 0.000184 | 0.000096 | 0.000445 | 0.000180 | 0.000048 | 1 | 0 |
| *Staphylococcus cohnii* |  | 0.000237 | 0.000000 | 0.000075 | 0.000032 | 0.000685 | 0.000036 | 0.000178 | 0.000064 | 1 | 0 |
| *Cutibacterium acnes* |  | 0.000167 | 0.000000 | 0.000065 | 0.000153 | 0.000408 | 0.000256 | 0.000175 | 0.000085 | 1 | 0 |
| *Micavibrio aeruginosavorus* |  | 0.000167 | 0.000252 | 0.000056 | 0.000123 | 0.000206 | 0.000241 | 0.000174 | 0.000010 | 1 | 0 |
| *Acinetobacter johnsonii* |  | 0.000119 | 0.000000 | 0.000077 | 0.000462 | 0.000099 | 0.000226 | 0.000164 | 0.000042 | 1 | 1 |
| *Neisseria subflava* |  | 0.000046 | 0.000000 | 0.000395 | 0.000105 | 0.000165 | 0.000263 | 0.000162 | 0.000008 | 1 | 1 |
| *Corynebacterium jeikeium* |  | 0.000193 | 0.000031 | 0.000095 | 0.000154 | 0.000106 | 0.000353 | 0.000155 | 0.000254 | 1 | 1 |
| *Neisseria sicca* |  | 0.000082 | 0.000108 | 0.000063 | 0.000181 | 0.000077 | 0.000397 | 0.000151 | 0.000026 | 1 | 1 |
| *Brochothrix thermosphacta* |  | 0.000307 | 0.000000 | 0.000082 | 0.000242 | 0.000097 | 0.000175 | 0.000150 | 0.000029 | 1 | 0 |
| *Corynebacterium kroppenstedtii* |  | 0.000157 | 0.000340 | 0.000062 | 0.000103 | 0.000080 | 0.000161 | 0.000150 | 0.000018 | 1 | 1 |
| *Corynebacterium striatum* |  | 0.000147 | 0.000190 | 0.000072 | 0.000126 | 0.000137 | 0.000227 | 0.000150 | 0.002615 | 1 | 1 |
| *Enterococcus durans* |  | 0.000243 | 0.000000 | 0.000111 | 0.000157 | 0.000275 | 0.000113 | 0.000150 | 0.000016 | 1 | 0 |
| *Staphylococcus hominis* |  | 0.000299 | 0.000000 | 0.000090 | 0.000159 | 0.000212 | 0.000129 | 0.000148 | 0.000128 | 1 | 1 |
| *Haemophilus pittmaniae* |  | 0.000174 | 0.000000 | 0.000158 | 0.000124 | 0.000113 | 0.000273 | 0.000140 | 0.000019 | 1 | 0 |
| *Pseudomonas otitidis* |  | 0.000077 | 0.000383 | 0.000075 | 0.000104 | 0.000075 | 0.000123 | 0.000140 | 0.000008 | 1 | 0 |
| *Neisseria gonorrhoeae* |  | 0.000105 | 0.000352 | 0.000020 | 0.000087 | 0.000021 | 0.000241 | 0.000138 | 0.022682 | 1 | 0 |
| *Treponema vincentii* |  | 0.000248 | 0.000000 | 0.000077 | 0.000147 | 0.000157 | 0.000187 | 0.000136 | 0.000006 | 1 | 0 |
| *Neisseria mucosa* |  | 0.000056 | 0.000031 | 0.000144 | 0.000126 | 0.000263 | 0.000192 | 0.000135 | 0.000007 | 1 | 1 |
| *Corynebacterium matruchotii* |  | 0.000119 | 0.000252 | 0.000087 | 0.000072 | 0.000093 | 0.000174 | 0.000133 | 0.000012 | 1 | 1 |
| *Arachnia rubra* |  | 0.000125 | 0.000318 | 0.000118 | 0.000052 | 0.000074 | 0.000112 | 0.000133 | 0.000009 | 1 | 0 |
| *Anaerolinea thermophila* |  | 0.000218 | 0.000000 | 0.000034 | 0.000131 | 0.000116 | 0.000292 | 0.000132 | 0.000025 | 1 | 0 |
| *Fusobacterium gonidiaformans* |  | 0.000297 | 0.000000 | 0.000102 | 0.000125 | 0.000125 | 0.000134 | 0.000130 | 0.000091 | 1 | 0 |
| *Staphylococcus pettenkoferi* |  | 0.000158 | 0.000000 | 0.000186 | 0.000108 | 0.000159 | 0.000163 | 0.000129 | 0.000075 | 1 | 0 |
| *Aggregatibacter segnis* |  | 0.000045 | 0.000108 | 0.000032 | 0.000058 | 0.000050 | 0.000480 | 0.000129 | 0.000018 | 1 | 1 |
| *Ignavibacterium album* |  | 0.000164 | 0.000000 | 0.000081 | 0.000145 | 0.000122 | 0.000254 | 0.000128 | 0.000063 | 1 | 0 |
| *Fusobacterium hwasookii* |  | 0.000260 | 0.000031 | 0.000120 | 0.000137 | 0.000104 | 0.000114 | 0.000127 | 0.000297 | 1 | 0 |
| *Rhodobacter capsulatus* |  | 0.000129 | 0.000031 | 0.000055 | 0.000260 | 0.000101 | 0.000179 | 0.000126 | 0.000041 | 1 | 0 |
| *Burkholderia cepacia* |  | 0.000104 | 0.000138 | 0.000056 | 0.000159 | 0.000078 | 0.000215 | 0.000125 | 0.000005 | 1 | 0 |
| *Actinomyces sp. HMT 175* |  | 0.000362 | 0.000159 | 0.000028 | 0.000108 | 0.000031 | 0.000054 | 0.000123 | 0.000005 | 1 | 0 |
| *Haemophilus parahaemolyticus* |  | 0.000063 | 0.000000 | 0.000046 | 0.000024 | 0.000329 | 0.000275 | 0.000123 | 0.000041 | 1 | 0 |
| *Cardiobacterium hominis* |  | 0.000111 | 0.000190 | 0.000038 | 0.000103 | 0.000130 | 0.000160 | 0.000122 | 0.000037 | 1 | 1 |
| *Acinetobacter lwoffii* |  | 0.000049 | 0.000288 | 0.000034 | 0.000083 | 0.000038 | 0.000227 | 0.000120 | 0.000015 | 1 | 1 |
| *Caldilinea aerophila* |  | 0.000237 | 0.000000 | 0.000052 | 0.000136 | 0.000134 | 0.000151 | 0.000118 | 0.000005 | 1 | 0 |
| *Treponema putidum* |  | 0.000204 | 0.000031 | 0.000070 | 0.000101 | 0.000095 | 0.000193 | 0.000116 | 0.000014 | 1 | 0 |
| *Corynebacterium aurimucosum* |  | 0.000175 | 0.000138 | 0.000049 | 0.000074 | 0.000086 | 0.000169 | 0.000115 | 0.000010 | 1 | 1 |
| *Neisseria elongata* |  | 0.000145 | 0.000031 | 0.000123 | 0.000097 | 0.000106 | 0.000189 | 0.000115 | 0.000047 | 1 | 1 |
| *Comamonas testosteroni* |  | 0.000168 | 0.000000 | 0.000051 | 0.000133 | 0.000095 | 0.000238 | 0.000114 | 0.000083 | 1 | 0 |
| *Aggregatibacter actinomycetemcomitans* |  | 0.000124 | 0.000159 | 0.000080 | 0.000050 | 0.000114 | 0.000152 | 0.000113 | 0.000015 | 1 | 0 |
| *Chlorobium limicola* |  | 0.000157 | 0.000126 | 0.000040 | 0.000099 | 0.000102 | 0.000140 | 0.000111 | 0.000028 | 1 | 0 |
| *Sanguibacter keddieii* |  | 0.000073 | 0.000383 | 0.000022 | 0.000082 | 0.000049 | 0.000049 | 0.000110 | 0.000010 | 1 | 0 |
| *Cutibacterium avidum* |  | 0.000193 | 0.000000 | 0.000049 | 0.000143 | 0.000122 | 0.000132 | 0.000107 | 0.000014 | 1 | 0 |
| *Corynebacterium macginleyi* |  | 0.000131 | 0.000269 | 0.000031 | 0.000044 | 0.000078 | 0.000054 | 0.000101 | 0.000101 | 1 | 0 |
| *Lawsonella clevelandensis* |  | 0.000130 | 0.000000 | 0.000032 | 0.000152 | 0.000081 | 0.000198 | 0.000099 | 0.009548 | 1 | 0 |
| *Leptotrichia shahii* |  | 0.000140 | 0.000215 | 0.000055 | 0.000050 | 0.000046 | 0.000086 | 0.000099 | 0.000054 | 1 | 0 |
| *Actinomyces radicidentis* |  | 0.000232 | 0.000031 | 0.000035 | 0.000097 | 0.000084 | 0.000113 | 0.000099 | 0.000011 | 1 | 0 |
| *Anoxybacillus flavithermus* |  | 0.000133 | 0.000108 | 0.000077 | 0.000105 | 0.000061 | 0.000105 | 0.000098 | 0.000023 | 1 | 0 |
| *Lysinibacillus fusiformis* |  | 0.000175 | 0.000031 | 0.000068 | 0.000074 | 0.000090 | 0.000146 | 0.000097 | 0.000052 | 1 | 0 |
| *Arcanobacterium haemolyticum* |  | 0.000134 | 0.000126 | 0.000069 | 0.000047 | 0.000082 | 0.000116 | 0.000096 | 0.000022 | 1 | 0 |
| *Campylobacter curvus* |  | 0.000126 | 0.000000 | 0.000068 | 0.000148 | 0.000076 | 0.000144 | 0.000094 | 0.000038 | 1 | 1 |
| *Staphylococcus pasteuri* |  | 0.000209 | 0.000000 | 0.000102 | 0.000074 | 0.000084 | 0.000067 | 0.000089 | 0.000026 | 1 | 0 |
| *Staphylococcus capitis* |  | 0.000176 | 0.000000 | 0.000044 | 0.000100 | 0.000098 | 0.000110 | 0.000088 | 0.000061 | 1 | 1 |
| *Corynebacterium tuberculostearicum* |  | 0.000120 | 0.000062 | 0.000054 | 0.000111 | 0.000075 | 0.000104 | 0.000087 | 0.000019 | 1 | 1 |
| *Schlegelella thermodepolymerans* |  | 0.000076 | 0.000000 | 0.000104 | 0.000091 | 0.000087 | 0.000165 | 0.000087 | 0.000003 | 1 | 0 |
| *Paracoccus yeei* |  | 0.000152 | 0.000159 | 0.000015 | 0.000089 | 0.000046 | 0.000061 | 0.000087 | 0.000025 | 1 | 0 |
| *Delftia acidovorans* |  | 0.000083 | 0.000000 | 0.000020 | 0.000089 | 0.000182 | 0.000148 | 0.000087 | 0.000020 | 1 | 1 |
| *Corynebacterium simulans* |  | 0.000097 | 0.000266 | 0.000012 | 0.000038 | 0.000049 | 0.000053 | 0.000086 | 0.000062 | 1 | 0 |
| *Staphylococcus caprae* |  | 0.000151 | 0.000000 | 0.000045 | 0.000102 | 0.000106 | 0.000099 | 0.000084 | 0.000017 | 1 | 0 |
| *Neisseria meningitidis* |  | 0.000051 | 0.000000 | 0.000092 | 0.000084 | 0.000066 | 0.000209 | 0.000084 | 0.000031 | 1 | 1 |
| *Neisseria bacilliformis* |  | 0.000093 | 0.000000 | 0.000081 | 0.000079 | 0.000093 | 0.000153 | 0.000083 | 0.000002 | 1 | 0 |
| *Schaalia cardiffensis* |  | 0.000201 | 0.000000 | 0.000032 | 0.000107 | 0.000052 | 0.000071 | 0.000077 | 0.000033 | 1 | 0 |
| *Roseomonas gilardii* |  | 0.000103 | 0.000031 | 0.000016 | 0.000102 | 0.000081 | 0.000120 | 0.000076 | 0.000010 | 1 | 0 |
| *Paenibacillus glucanolyticus* |  | 0.000113 | 0.000000 | 0.000085 | 0.000061 | 0.000069 | 0.000119 | 0.000075 | 0.000004 | 1 | 0 |
| *Kingella oralis* |  | 0.000169 | 0.000000 | 0.000032 | 0.000064 | 0.000056 | 0.000125 | 0.000074 | 0.000007 | 1 | 1 |
| *Kingella denitrificans* |  | 0.000076 | 0.000159 | 0.000028 | 0.000047 | 0.000056 | 0.000074 | 0.000073 | 0.000023 | 1 | 0 |
| *Brevundimonas diminuta* |  | 0.000029 | 0.000216 | 0.000009 | 0.000064 | 0.000030 | 0.000054 | 0.000067 | 0.000005 | 1 | 0 |
| *Kytococcus sedentarius* |  | 0.000103 | 0.000000 | 0.000010 | 0.000116 | 0.000064 | 0.000106 | 0.000066 | 0.000005 | 1 | 0 |
| *Campylobacter sputorum* |  | 0.000130 | 0.000031 | 0.000034 | 0.000063 | 0.000073 | 0.000057 | 0.000065 | 0.000065 | 1 | 0 |
| *Corynebacterium propinquum* |  | 0.000088 | 0.000000 | 0.000051 | 0.000085 | 0.000065 | 0.000092 | 0.000064 | 0.000014 | 1 | 0 |
| *Capnocytophaga leadbetteri* |  | 0.000029 | 0.000031 | 0.000032 | 0.000046 | 0.000057 | 0.000186 | 0.000063 | 0.000007 | 1 | 0 |
| *Staphylococcus schleiferi* |  | 0.000130 | 0.000000 | 0.000061 | 0.000072 | 0.000058 | 0.000048 | 0.000062 | 0.000022 | 1 | 0 |
| *Ralstonia pickettii* |  | 0.000069 | 0.000000 | 0.000022 | 0.000081 | 0.000041 | 0.000152 | 0.000061 | 0.000001 | 1 | 0 |
| *Actinomyces viscosus* |  | 0.000189 | 0.000000 | 0.000025 | 0.000080 | 0.000027 | 0.000042 | 0.000061 | 0.000002 | 1 | 1 |
| *Capnocytophaga ochracea* |  | 0.000056 | 0.000000 | 0.000059 | 0.000057 | 0.000077 | 0.000113 | 0.000060 | 0.000070 | 1 | 1 |
| *Acinetobacter junii* |  | 0.000097 | 0.000031 | 0.000087 | 0.000052 | 0.000057 | 0.000035 | 0.000060 | 0.000027 | 1 | 1 |
| *Leptotrichia hongkongensis* |  | 0.000132 | 0.000000 | 0.000050 | 0.000051 | 0.000040 | 0.000079 | 0.000059 | 0.000049 | 1 | 0 |
| *Corynebacterium coyleae* |  | 0.000089 | 0.000000 | 0.000058 | 0.000072 | 0.000044 | 0.000089 | 0.000059 | 0.000008 | 1 | 0 |
| *Staphylococcus lugdunensis* |  | 0.000128 | 0.000000 | 0.000032 | 0.000076 | 0.000033 | 0.000081 | 0.000058 | 0.000130 | 1 | 1 |
| *Corynebacterium bovis* |  | 0.000051 | 0.000000 | 0.000031 | 0.000077 | 0.000066 | 0.000125 | 0.000058 | 0.000001 | 1 | 0 |
| *Kingella kingae* |  | 0.000078 | 0.000000 | 0.000021 | 0.000027 | 0.000060 | 0.000158 | 0.000057 | 0.000020 | 1 | 0 |
| *Leptotrichia hofstadii* |  | 0.000122 | 0.000031 | 0.000042 | 0.000054 | 0.000030 | 0.000064 | 0.000057 | 0.000016 | 1 | 1 |
| *Neisseria flavescens* |  | 0.000038 | 0.000000 | 0.000088 | 0.000065 | 0.000052 | 0.000094 | 0.000056 | 0.000002 | 1 | 1 |
| *Leptotrichia buccalis* |  | 0.000118 | 0.000000 | 0.000045 | 0.000044 | 0.000069 | 0.000059 | 0.000056 | 0.000023 | 1 | 1 |
| *Neisseria weaveri* |  | 0.000076 | 0.000000 | 0.000035 | 0.000085 | 0.000035 | 0.000094 | 0.000054 | 0.000003 | 1 | 0 |
| *Kocuria rhizophila* |  | 0.000083 | 0.000031 | 0.000022 | 0.000058 | 0.000058 | 0.000073 | 0.000054 | 0.000017 | 1 | 1 |
| *Neisseria lactamica* |  | 0.000062 | 0.000000 | 0.000067 | 0.000027 | 0.000081 | 0.000086 | 0.000054 | 0.000010 | 1 | 1 |
| *Staphylococcus warneri* |  | 0.000124 | 0.000000 | 0.000024 | 0.000079 | 0.000029 | 0.000056 | 0.000052 | 0.000055 | 1 | 1 |
| *Corynebacterium urealyticum* |  | 0.000081 | 0.000000 | 0.000068 | 0.000050 | 0.000053 | 0.000059 | 0.000052 | 0.000013 | 1 | 0 |
| *Kocuria palustris* |  | 0.000080 | 0.000000 | 0.000017 | 0.000065 | 0.000053 | 0.000086 | 0.000050 | 0.000003 | 1 | 0 |
| *Janibacter indicus* |  | 0.000044 | 0.000000 | 0.000014 | 0.000068 | 0.000034 | 0.000139 | 0.000050 | 0.000001 | 1 | 0 |
| *Staphylococcus auricularis* |  | 0.000103 | 0.000000 | 0.000027 | 0.000031 | 0.000086 | 0.000050 | 0.000050 | 0.000013 | 1 | 0 |
| *Acinetobacter radioresistens* |  | 0.000093 | 0.000000 | 0.000059 | 0.000034 | 0.000057 | 0.000053 | 0.000049 | 0.000060 | 1 | 1 |
| *Cutibacterium granulosum* |  | 0.000063 | 0.000031 | 0.000013 | 0.000059 | 0.000043 | 0.000073 | 0.000047 | 0.000014 | 1 | 0 |
| *Bacillus anthracis* |  | 0.000151 | 0.000000 | 0.000046 | 0.000022 | 0.000019 | 0.000027 | 0.000044 | 0.000312 | 1 | 0 |
| *Corynebacterium minutissimum* |  | 0.000103 | 0.000000 | 0.000014 | 0.000039 | 0.000022 | 0.000080 | 0.000043 | 0.000004 | 1 | 0 |
| *Moraxella catarrhalis* |  | 0.000034 | 0.000000 | 0.000031 | 0.000047 | 0.000095 | 0.000047 | 0.000042 | 0.000654 | 1 | 1 |
| *Mycoplasma hominis* |  | 0.000105 | 0.000000 | 0.000023 | 0.000035 | 0.000043 | 0.000031 | 0.000040 | 0.000017 | 1 | 1 |
| *Cupriavidus gilardii* |  | 0.000029 | 0.000126 | 0.000013 | 0.000022 | 0.000016 | 0.000031 | 0.000040 | 0.000002 | 1 | 0 |
| *Corynebacterium singulare* |  | 0.000069 | 0.000000 | 0.000012 | 0.000054 | 0.000032 | 0.000053 | 0.000037 | 0.000006 | 1 | 0 |
| *Fusobacterium periodonticum* | 1 | 0.000037 | 0.000000 | 0.000020 | 0.000036 | 0.000087 | 0.000040 | 0.000037 | 0.000043 | 1 | 0 |
| *Mesorhizobium loti* |  | 0.000065 | 0.000000 | 0.000009 | 0.000026 | 0.000033 | 0.000077 | 0.000035 | 0.000001 | 1 | 0 |
| *Simonsiella muelleri* |  | 0.000033 | 0.000000 | 0.000028 | 0.000026 | 0.000023 | 0.000089 | 0.000033 | 0.000012 | 1 | 0 |
| *Yersinia pestis* |  | 0.000016 | 0.000000 | 0.000085 | 0.000033 | 0.000046 | 0.000018 | 0.000033 | 0.000123 | 1 | 0 |
| *Corynebacterium amycolatum* |  | 0.000055 | 0.000000 | 0.000008 | 0.000051 | 0.000021 | 0.000052 | 0.000031 | 0.000141 | 1 | 1 |
| *Aerococcus viridans* |  | 0.000056 | 0.000000 | 0.000025 | 0.000032 | 0.000031 | 0.000039 | 0.000031 | 0.000177 | 1 | 1 |
| *Candidatus Saccharimonas aalborgensis* |  | 0.000054 | 0.000000 | 0.000029 | 0.000012 | 0.000020 | 0.000045 | 0.000027 | 0.000004 | 1 | 0 |
| *Mycoplasma genitalium* |  | 0.000035 | 0.000000 | 0.000006 | 0.000014 | 0.000040 | 0.000065 | 0.000027 | 0.000011 | 1 | 0 |
| *Mycoplasma salivarium* |  | 0.000070 | 0.000000 | 0.000021 | 0.000036 | 0.000019 | 0.000011 | 0.000026 | 0.000005 | 1 | 0 |
| *Neisseria cinerea* |  | 0.000017 | 0.000000 | 0.000071 | 0.000015 | 0.000015 | 0.000027 | 0.000024 | 0.000002 | 1 | 1 |
| *Mycobacterium leprae* |  | 0.000029 | 0.000000 | 0.000016 | 0.000008 | 0.000031 | 0.000037 | 0.000020 | 0.000002 | 1 | 0 |
| *Neisseria polysaccharea* |  | 0.000016 | 0.000000 | 0.000011 | 0.000040 | 0.000022 | 0.000028 | 0.000019 | 0.000033 | 1 | 0 |
| *Roseomonas mucosa* |  | 0.000032 | 0.000000 | 0.000007 | 0.000027 | 0.000009 | 0.000039 | 0.000019 | 0.000001 | 1 | 0 |
| *Mycoplasma orale* |  | 0.000049 | 0.000031 | 0.000012 | 0.000007 | 0.000007 | 0.000007 | 0.000019 | 0.000006 | 1 | 0 |
| *Acidovorax ebreus* |  | 0.000015 | 0.000000 | 0.000010 | 0.000042 | 0.000005 | 0.000033 | 0.000018 | 0.000034 | 1 | 0 |
| *Mycobacterium tuberculosis* |  | 0.000024 | 0.000000 | 0.000024 | 0.000023 | 0.000009 | 0.000017 | 0.000016 | 0.000188 | 1 | 0 |
| *Pseudomonas luteola* |  | 0.000024 | 0.000000 | 0.000015 | 0.000013 | 0.000014 | 0.000028 | 0.000016 | 0.000001 | 1 | 0 |
| *Bartonella schoenbuchensis* |  | 0.000027 | 0.000000 | 0.000007 | 0.000013 | 0.000019 | 0.000028 | 0.000016 | 0.000014 | 1 | 0 |
| *Moraxella nonliquefaciens* |  | 0.000019 | 0.000000 | 0.000004 | 0.000013 | 0.000007 | 0.000023 | 0.000011 | 0.000020 | 1 | 0 |
| *Treponema pallidum* |  | 0.000014 | 0.000000 | 0.000005 | 0.000008 | 0.000007 | 0.000012 | 0.000008 | <0.0000001 | 1 | 0 |
| *Mycoplasma pneumoniae* |  | 0.000011 | 0.000000 | 0.000005 | 0.000007 | 0.000009 | 0.000006 | 0.000006 | 0.000037 | 1 | 0 |
| *Bradyrhizobium elkanii* |  | 0.000002 | 0.000000 | 0.000000 | 0.000000 | 0.000020 | 0.000001 | 0.000004 | <0.0000001 | 1 | 0 |
| *Bordetella pertussis* |  | 0.000005 | 0.000000 | 0.000002 | 0.000007 | 0.000003 | 0.000006 | 0.000004 | 0.000003 | 1 | 0 |
| *Arthrospira platensis* |  | 0.000013 | 0.000000 | 0.000003 | 0.000001 | 0.000000 | 0.000000 | 0.000003 | 0.000002 | 1 | 0 |
| *Neisseria perflava* |  | 0.000006 | 0.000000 | 0.000002 | 0.000000 | 0.000001 | 0.000002 | 0.000002 | <0.0000001 | 1 | 0 |
| *Haemophilus aegyptius* |  | 0.000000 | 0.000000 | 0.000003 | 0.000000 | 0.000001 | 0.000003 | 0.000001 | <0.0000001 | 1 | 0 |
| **SUM** |  | **1.59** | **0.40** | **1.85** | **3.04** | **1.36** | **0.79** | **1.51** | **5.96** |  |  |

xmost abundant species in the gut

ymost abundant species in the DFU

HOMD and HMP: absence=0 and presence=1.
